# Supplementary material
Source: MDPI journal article supplement (https://www.mdpi.com/2072-4292/14/14/3284)
Supplement: s1 [file s1]

### Supplementary Materials

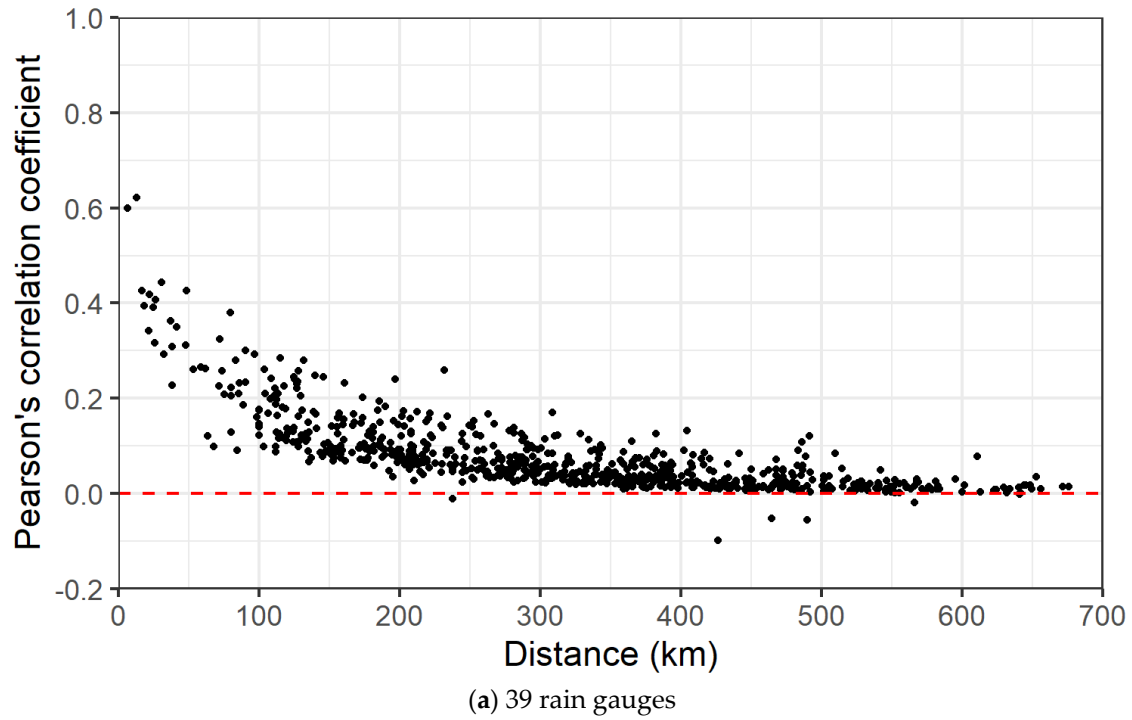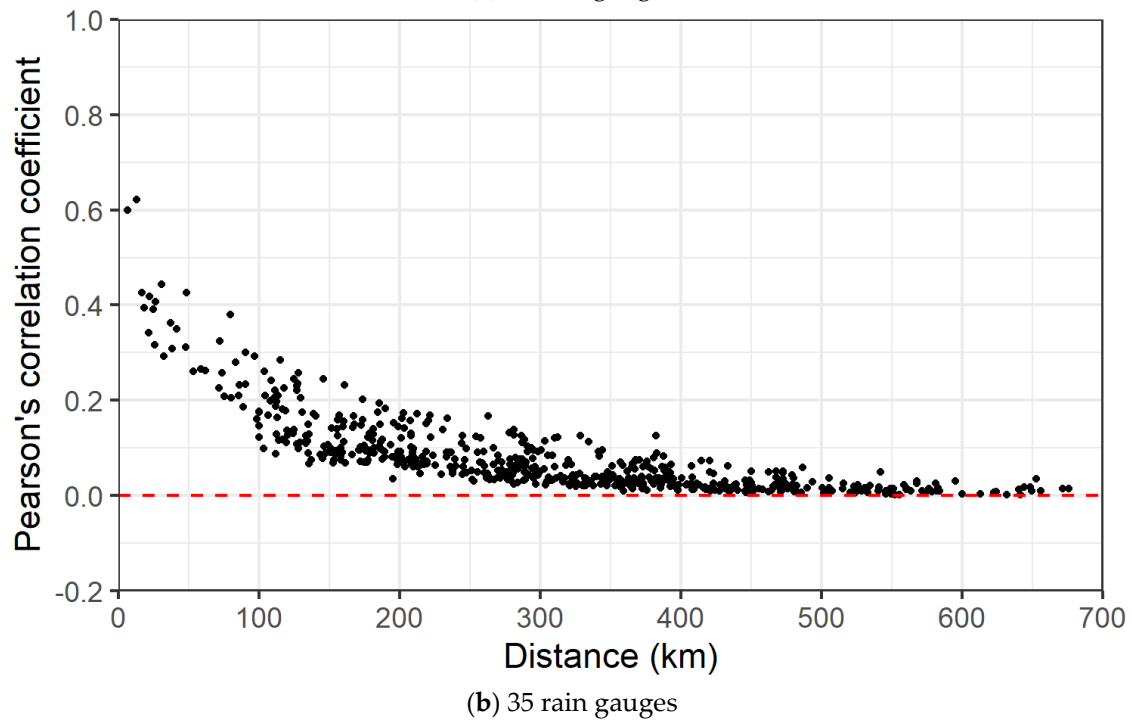

**Figure S1.** Hourly precipitation spatial correlation as a function of distance among the rain gauges. These results include (a) 39 rain gauges with at least one year of hourly precipitation and (b) 35 rain gauges finally selected after quality control.

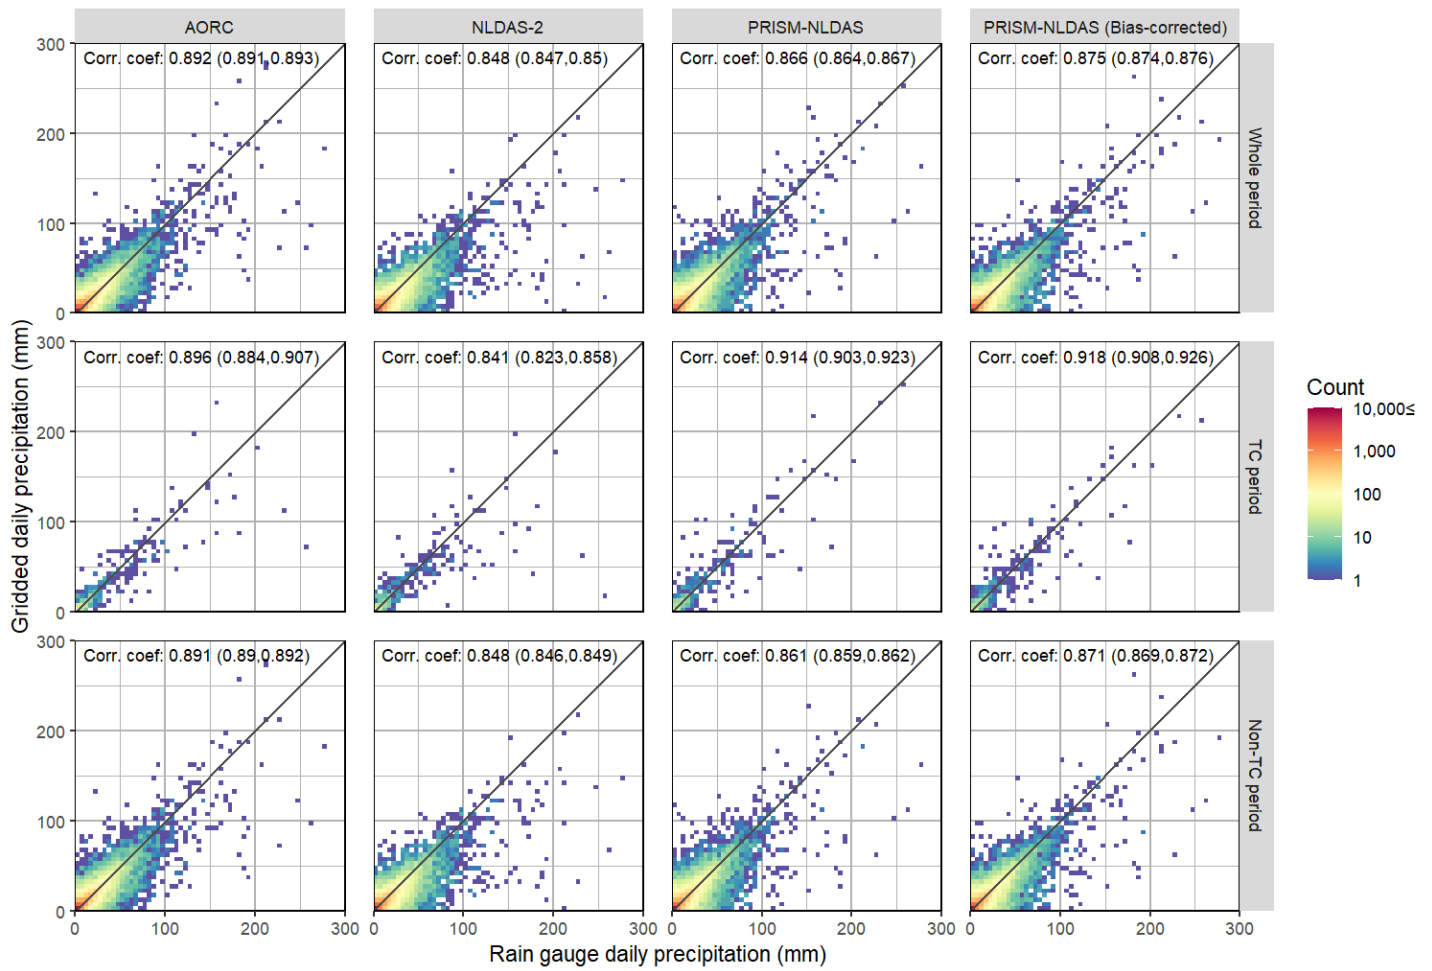

**Figure S2.** Plots showing the 2D histogram of rain gauge and gridded daily precipitation for the whole, TC, and non-TC periods. The values in parentheses are 95% confidence intervals for correlation coefficients.

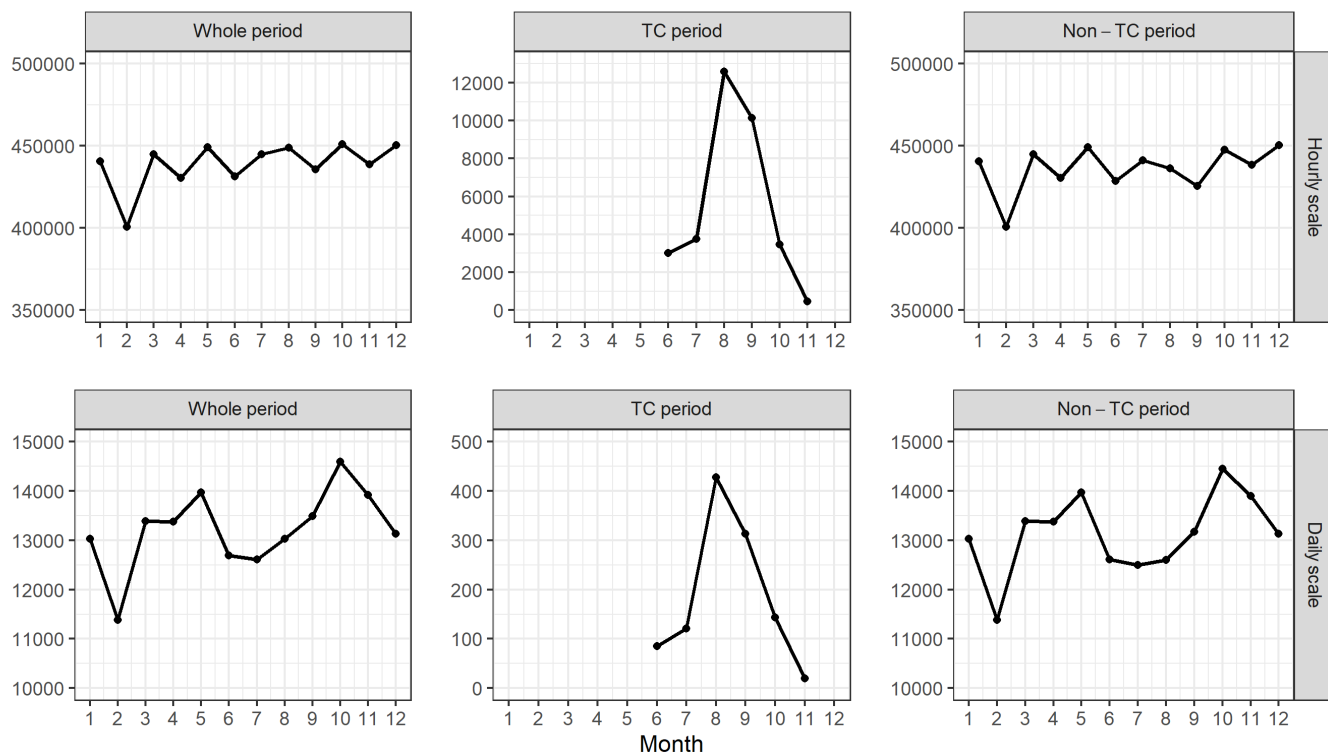

**Figure S3.** The number of hourly (upper panel) and daily (lower panel) rainfall samples depending on months for the whole, TC, and non-TC periods.

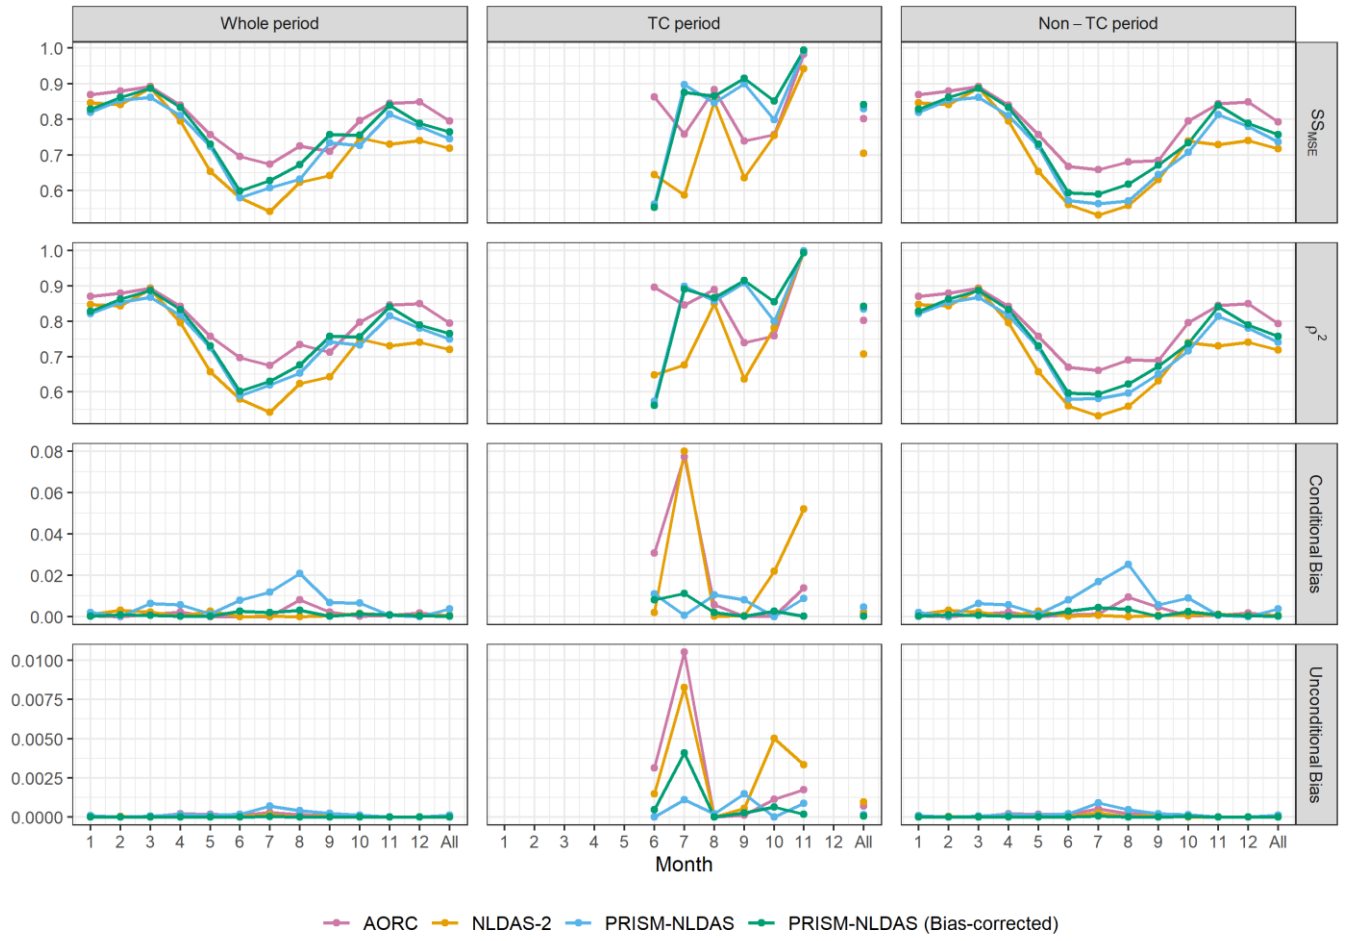

**Figure S4.** Mean square error skill score and its components (potential skill, conditional bias, and unconditional bias) of gridded daily rainfall products depending on months for the whole, TC, and non-TC periods. Larger (smaller) values are preferable in the top (bottom) two panels.

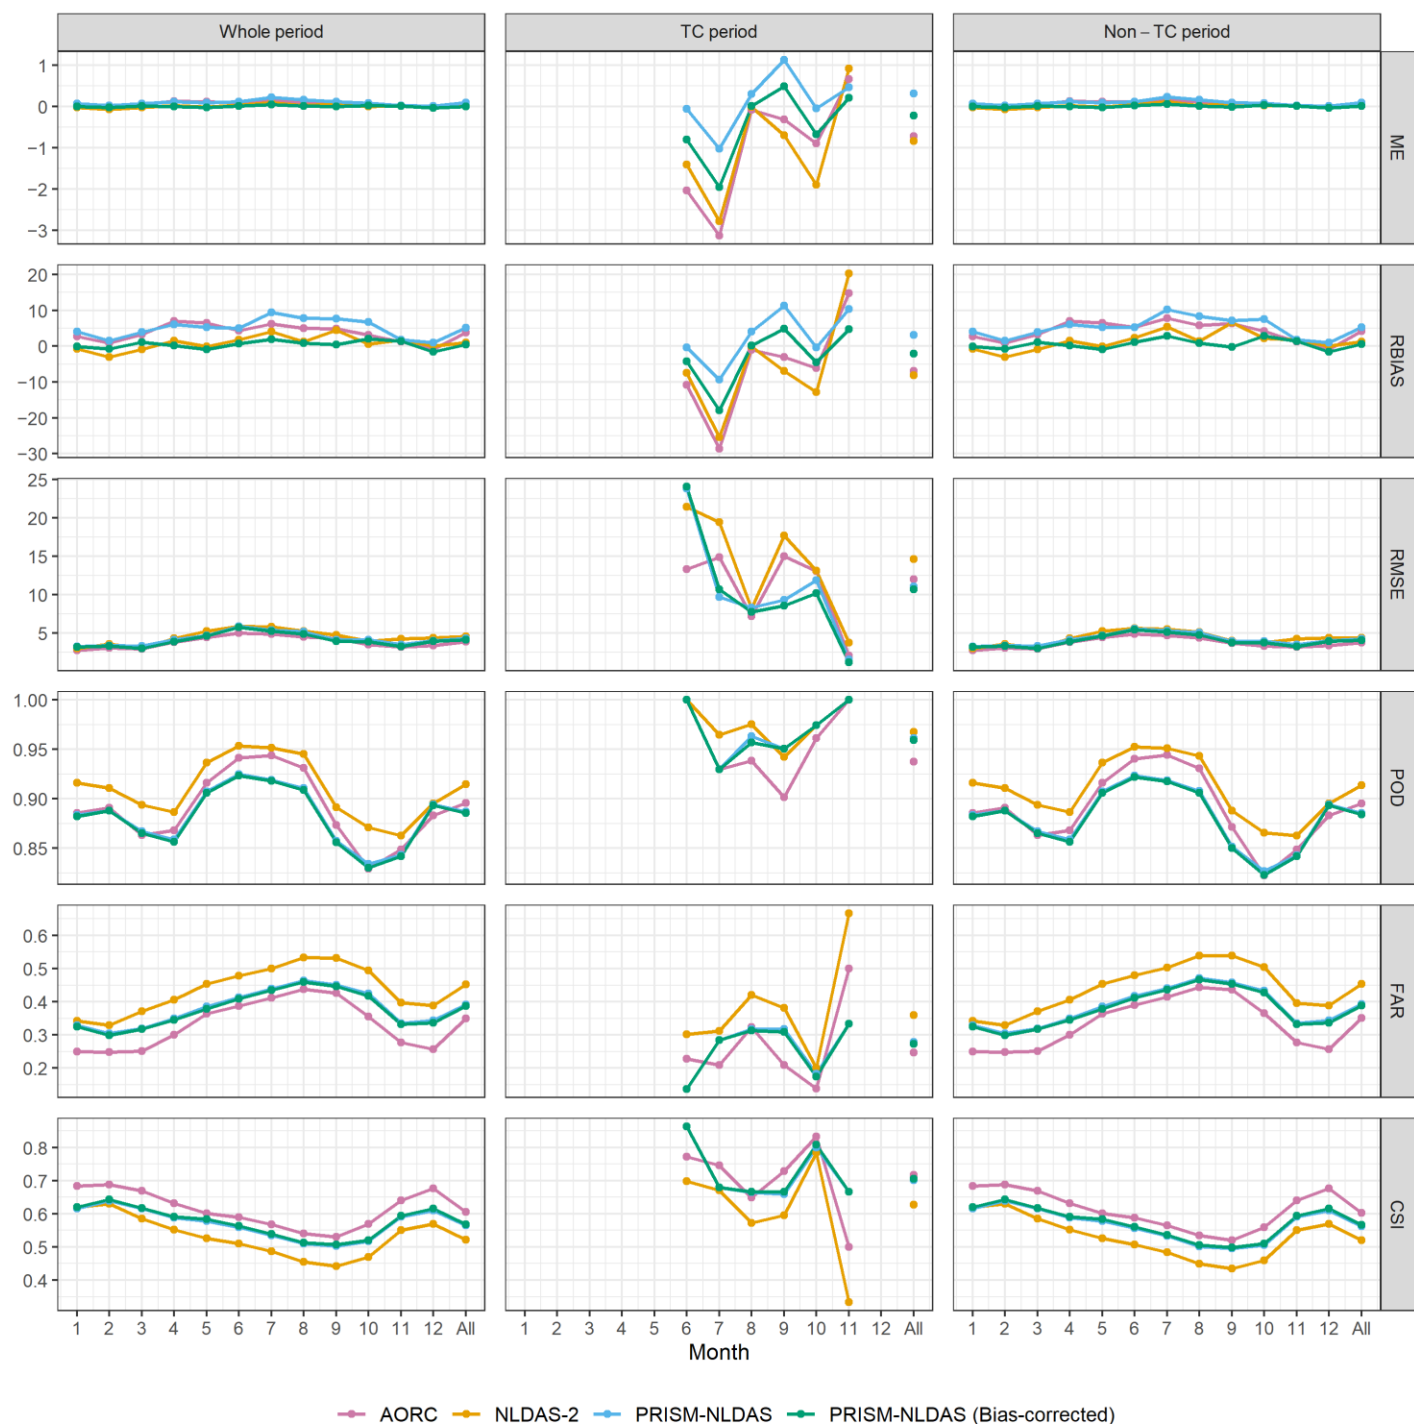

**Figure S5.** Error metrics (mean error, relative bias, and root mean square error) and contingency metrics (POD, FAR, and CSI) of gridded daily rainfall products depending on months for the whole, TC, and non-TC periods. In the top three rows, values closer to zero are preferable. Larger values are preferable in the fourth and sixth rows, while smaller values are preferable in the fifth row.
